# Supplementary material for: Nanostructured thin lignin-derived carbon sheets as excellent reinforcement fillers in polypropylene
Source: Royal Society of Chemistry journal article supplement (doi:10.1039/c8ra08302a), 2018-01-01
Supplement: c8ra08302a1.pdf [file c8ra08302a1.pdf]

## Supporting Information

# **Nanostructured Thin Lignin-Derived Carbon Sheet as Excellent Reinforcement Filler in Polypropylene**

*Fenggui Chen,<sup>a,\*</sup> Wenbing Shi,<sup>a</sup> Dan Zhou,<sup>b</sup> Qinqin Zhang,<sup>a</sup> Liping Lv,<sup>a</sup> Jiaotong  
Sun,<sup>b,\*</sup> Liping Yang<sup>c</sup>*

*<sup>a</sup>School of Chemistry and Chemical Engineering, Yangtze Normal University, Fuling, Chongqing  
408100, China*

*<sup>b</sup>School of Materials Science and Engineering, Yangtze Normal University, Fuling, Chongqing  
408100, China*

*<sup>c</sup>Guangdong Gulf New Materials Research Institute, Shenzhen 518000, Guangdong, China*

*\*Corresponding author. Email: fgchen@yznu.cn (F.G. Chen); jiaotongsun@outlook.com (J.T. Sun)*

Totally 6 pages with 1 table and 4 figures.

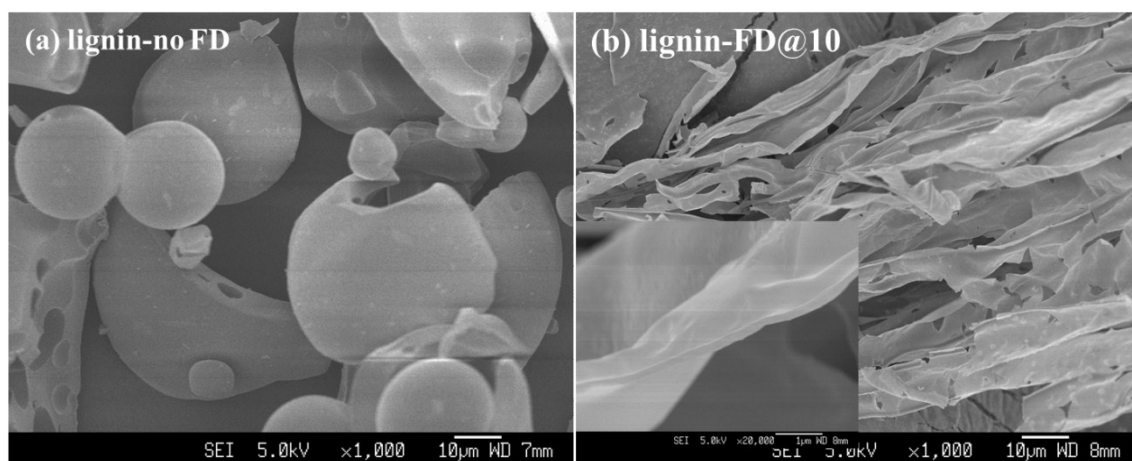

**Fig. S1** SEM images of (a) as-received lignin, (b) freeze-dried lignin at lignin concentration of 10 mg/mL. (inset scale bar: 1µm) .

**Table S1.** Properties of lignin and lignin-derived carbon prepared by FD of 10 mg/mL lignin aqueous solutions, frozen at -196 °C, and subsequent carbonization at varying temperatures.

| Sample                          | Carbonization temp.<br>(°C) | Specific surface area<br>(m <sup>2</sup> /g) | Pore polume<br>(cm <sup>3</sup> /g) |
|---------------------------------|-----------------------------|----------------------------------------------|-------------------------------------|
| Lignin                          | - <sup>a</sup>              | 0                                            | 0                                   |
| AR-LC--600                      | - <sup>a</sup>              | 0.8                                          | 0.01                                |
| Freeze-dried lignin<br>@10mg/mL | 300                         | 4                                            | 0.01                                |
| FD-LC@10--600                   | 600                         | 143                                          | 0.04                                |
| FD-LC@10--900                   | 900                         | 202                                          | 0.13                                |

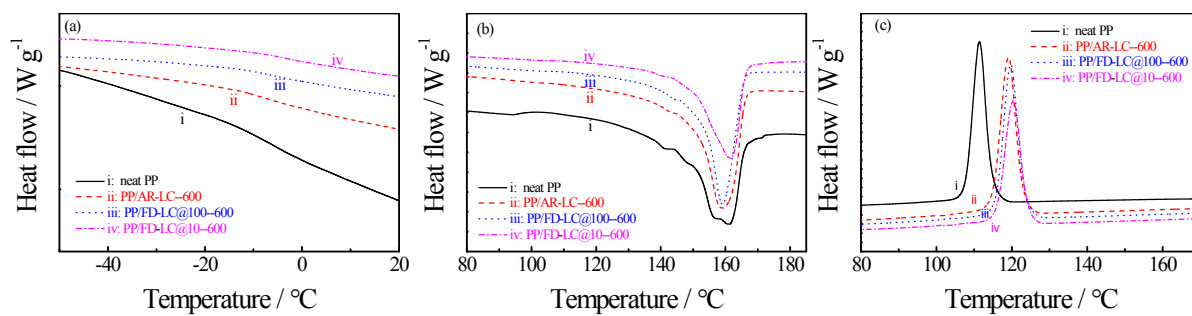

**Fig. S2** DSC curves of neat PP (i), and PP based composites containing 2 wt% AR-LC(ii), FD-LCs at lignin conc. of 100 mg/mL (iii), FD-LCs at conc. of 10 mg/mL (iv), which all are carbonized at 600 °C. DSC was conducted at heating rate of 10 °C/min in N<sub>2</sub> atmosphere.

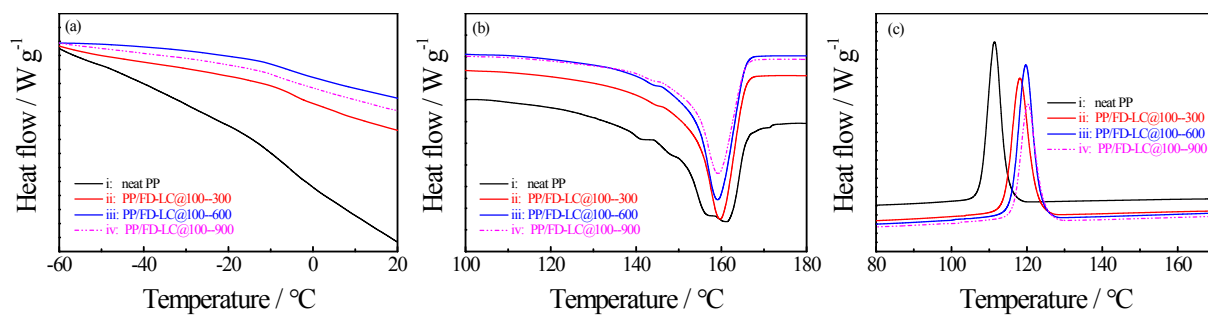

**Fig. S3** DSC curves of neat PP (i), and PP/LC composites containing 2 wt% LC at lignin conc. of 100 mg/mL. LCs are respectively carbonized at 300 °C (ii), 600 °C (iii), 900 °C (iv). DSC was conducted at heating rate of 10°C/min in N<sub>2</sub> atmosphere.

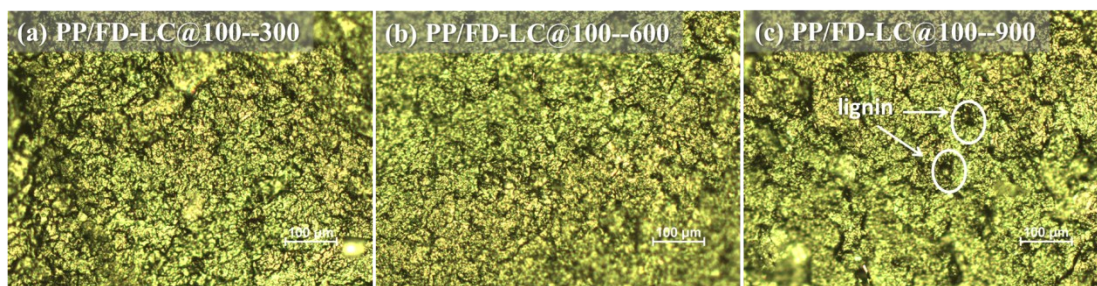

**Fig. S4** POM ( $\times 100$ ) images of the PP composites containing 2 wt% FD-LC at lignin concentration of 100 mg/mL, which are respectively carbonized at 300°C (a), 600°C (b) and 900°C (c).
